# Supplementary material for: Natural hazard events affecting transportation networks in Switzerland from 2012 to 2016
Source: Copernicus journal article supplement (doi:10.5194/nhess-18-2093-2018), 2018-08-08
Supplement: Supplementary file 1 [file nhess-18-2093-2018-supplement.pdf]

Supplement of Nat. Hazards Earth Syst. Sci., 18, 2093–2109, 2018  
<https://doi.org/10.5194/nhess-18-2093-2018-supplement>  
© Author(s) 2018. This work is distributed under  
the Creative Commons Attribution 4.0 License.

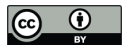

Natural Hazards  
and Earth System  
Sciences

Open Access

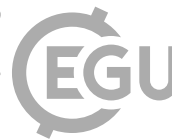

*Supplement of*

## **Natural hazard events affecting transportation networks in Switzerland from 2012 to 2016**

**Jérémie Voumard et al.**

*Correspondence to:* Jérémie Voumard ([jeremie.voumard@unil.ch](mailto:jeremie.voumard@unil.ch))

The copyright of individual parts of the supplement might differ from the CC BY 4.0 License.

## Supplementary Material

Table S1: 51 key words (in red) used in the Google Alerts to create the database. The numbers between brackets in the following tables refer to the number of elements considered according to the line or column attribute.

| English        | French                | German          | Italian      | 5 |
|----------------|-----------------------|-----------------|--------------|---|
| avalanche      | avalanche             | Lawinne         | valanga      | 6 |
| bad weather    | intempéries           | Unwetter        |              |   |
| flood          |                       | Hochwasser      |              |   |
| hail           | grêle                 | Hagel           |              | 7 |
| heavy rainfall | forte pluies          | Heftige Regen   |              |   |
| ice avalanche  |                       | Eislawine       |              | 8 |
| inundation     |                       | Überflutung     |              |   |
| inundation     | inondation            | Überschwemmung  |              |   |
| landslide      | glissement de terrain | Erdrutsch       | frana        |   |
| landslide      |                       | Hangrutsch      |              |   |
| landslide      |                       | Hachrutsche     |              |   |
| landslide      |                       | Rüfenniedergang |              |   |
| landslip       | glissement            | Rutschung       |              |   |
| mountain       | pan de montagne       |                 |              |   |
| mud            | boue                  | Schlamm         |              |   |
| mudflow        | coulée de boue        | Schlammlawine   |              |   |
| mudslide       |                       | Erdlawine       |              |   |
| pirock         | caillou               | Stein           | massi        |   |
| rockfall       |                       | Bergsturz       |              |   |
| rockfall       |                       | Felsabbruch     |              |   |
| rockfall       | éboulement            | Felsbrock       |              |   |
| rockfall       | écroulement           | Felsbrocken     |              |   |
| rockfall       |                       | Felssturz       |              |   |
| rockslide      | chute de blocs        | Steinschlag     | cadono sassi |   |
| scree          |                       | Geröll          |              |   |
| scree          | éboulis               | Schutt          |              |   |
| storm          | tempête               | Sturm           |              |   |
| thunderstorm   | orage                 | Gewitter        |              |   |
| under water    | sous l'eau            |                 |              |   |
| wind           | vent                  | Wind            |              |   |

Table S2: Cost value estimation by square metre for the cost evaluation according to event importance, damage level and transport mode.

| Damage level<br>[EUR] | Cost per m <sup>2</sup> ,<br>small event,<br>road | Cost per m <sup>2</sup> ,<br>middle event,<br>road | Cost per m <sup>2</sup> ,<br>large event,<br>road | Cost per m <sup>2</sup> ,<br>small event,<br>train | Cost per m <sup>2</sup> ,<br>middle event,<br>train | Cost per m <sup>2</sup> ,<br>large event,<br>train |
|-----------------------|---------------------------------------------------|----------------------------------------------------|---------------------------------------------------|----------------------------------------------------|-----------------------------------------------------|----------------------------------------------------|
| No closure            | 5                                                 | 5                                                  | 5                                                 | 5                                                  | 5                                                   | 5                                                  |
| Closure               | 85                                                | 130                                                | 170                                               | 300                                                | 340                                                 | 385                                                |
| Partial damage        | 255                                               | 300                                                | 340                                               | 470                                                | 510                                                 | 555                                                |
| Total destruction     | 850                                               | 890                                                | 980                                               | 1065                                               | 1105                                                | 1145                                               |
| Unknown damage        | 130                                               | 170                                                | 215                                               | 255                                                | 300                                                 | 340                                                |

Table S3: Distribution of event locations by Swiss geomorphologic-climatic region and event process.

| Geomorphologic-climatic region | Flood<br>(420) | Debris flow<br>(69) | Landslide<br>(192) | Rockfall<br>(96) | Avalanche<br>(16) | Other<br>(53) | Average |
|--------------------------------|----------------|---------------------|--------------------|------------------|-------------------|---------------|---------|
| Jura (98)                      | 19%            | 0%                  | 3%                 | 6%               | 0%                | 15%           | 12%     |
| Plateau (371)                  | 57%            | 4%                  | 42%                | 6%               | 0%                | 79%           | 44%     |
| Alps (377)                     | 24%            | 96%                 | 55%                | 88%              | 100%              | 6%            | 44%     |
| Total (846)                    | 100%           | 100%                | 100%               | 100%             | 100%              | 100%          | 100%    |

*Table S4: Distribution of event locations by event process.*

| Event location   | Flood<br>(420) | Debris flow<br>(69) | Landslide<br>(192) | Rockfall<br>(96) | Avalanche<br>(16) | Other<br>(53) | Average |
|------------------|----------------|---------------------|--------------------|------------------|-------------------|---------------|---------|
| Town (151)       | 15%            | 0%                  | 9%                 | 1%               | 0%                | 6%            | 18%     |
| Village (261)    | 46%            | 14%                 | 12%                | 6%               | 13%               | 4%            | 31%     |
| Forest (185)     | 4%             | 46%                 | 38%                | 58%              | 13%               | 13%           | 22%     |
| Unforested (249) | 0%             | 6%                  | 5%                 | 12%              | 69%               | 0%            | 29%     |
| Total (846)      | 100%           | 100%                | 100%               | 100%             | 100%              | 100%          | 100%    |

*Table S5: Distribution of slope angle by event process.*

| Slope angle       | Flood<br>(420) | Debris flow<br>(69) | Landslide<br>(192) | Rockfall<br>(96) | Avalanche<br>(16) | Other<br>(53) | Average |
|-------------------|----------------|---------------------|--------------------|------------------|-------------------|---------------|---------|
| 0°-10° (339)      | 62%            | 17%                 | 12%                | 5%               | 6%                | 68%           | 40%     |
| 10°-20° (257)     | 31%            | 43%                 | 29%                | 19%              | 38%               | 28%           | 30%     |
| 20°-30° (131)     | 4%             | 23%                 | 33%                | 31%              | 38%               | 2%            | 15%     |
| 30°-40° (85)      | 2%             | 12%                 | 21%                | 26%              | 19%               | 0%            | 10%     |
| 40°-50° (26)      | 0%             | 4%                  | 4%                 | 14%              | 0%                | 2%            | 3%      |
| 50°-60° (6)       | 0%             | 0%                  | 1%                 | 4%               | 0%                | 0%            | 1%      |
| 60 and higher (2) | 0%             | 0%                  | 1%                 | 1%               | 0%                | 0%            | 0%      |
| Total (846)       | 100%           | 100%                | 100%               | 100%             | 100%              | 100%          | 100%    |

*Table S6: Distribution of event importance by event process.*

| Location of<br>process origin | Flood<br>(420) | Debris flow<br>(69) | Landslide<br>(192) | Rockfall<br>(96) | Avalanche<br>(16) | Other<br>(53) | Average |
|-------------------------------|----------------|---------------------|--------------------|------------------|-------------------|---------------|---------|
| Small <sup>1</sup> (804)      | 100%           | 78%                 | 96%                | 24%              | 81%               | 100%          | 95%     |
| Middle <sup>2</sup> (33)      | 0%             | 19%                 | 3%                 | 43%              | 19%               | 0%            | 4%      |
| Large <sup>3</sup> (9)        | 0%             | 3%                  | 1%                 | 33%              | 0%                | 0%            | 1%      |
| Total (846)                   | 100%           | 100%                | 100%               | 100%             | 100%              | 100%          | 100%    |

<sup>1</sup> Small event: volume of deposit material on the track <10 m<sup>3</sup>.

<sup>2</sup> Middle event: volume of deposit material on the track of 10-2000 m<sup>3</sup>.

<sup>3</sup> Large event: volume of deposit material on the track > 2000 m<sup>3</sup>.

*Table S7: Distribution of the distance of the process origin by event process.*

| Distance of the<br>process origin | Debris flow<br>(69) | Landslide<br>(192) | Rockfall<br>(96) | Avalanche<br>(16) | Other<br>(53) | Average |
|-----------------------------------|---------------------|--------------------|------------------|-------------------|---------------|---------|
| Near <sup>1</sup> (185)           | 0%                  | 52%                | 33%              | 6%                | 100%          | 35%     |
| Far <sup>2</sup> (146)            | 100%                | 11%                | 43%              | 94%               | 0%            | 39%     |
| Unknown (95)                      | 0%                  | 37%                | 24%              | 0%                | 0%            | 26%     |
| Total (426)                       | 100%                | 100%               | 100%             | 100%              | 100%          | 100%    |

<sup>1</sup> Near: 0-50 m from the track.

<sup>2</sup> Far: > 50 m from the track.

*Table S8: Distribution of the location of the process origin by event process.*

| Location of<br>process origin | Debris flow<br>(69) | Landslide<br>(192) | Rockfall<br>(96) | Avalanche<br>(16) | Other<br>(53) | Average |
|-------------------------------|---------------------|--------------------|------------------|-------------------|---------------|---------|
| Above track (339)             | 100%                | 60%                | 89%              | 100%              | 100%          | 80%     |
| Below track (29)              | 0%                  | 14%                | 2%               | 0%                | 0%            | 7%      |
| Unknown (58)                  | 0%                  | 26%                | 9%               | 0%                | 0%            | 14%     |
| Total (426)                   | 100%                | 100%               | 100%             | 100%              | 100%          | 100%    |

*Table S9: Rainfall [mm] during the natural hazard events.*

| Rainfall* [mm]                               | Flood | Debris flow | Landslide | Rockfall | Avalanche | Other | Average |
|----------------------------------------------|-------|-------------|-----------|----------|-----------|-------|---------|
| Event day                                    | 22    | 14          | 17        | 5        | 4         | 4     | 17      |
| Cum. last 5 days <sup>1</sup>                | 49    | 32          | 57        | 27       | 32        | 15    | 45      |
| Cum. last 10 days <sup>1</sup>               | 76    | 55          | 88        | 52       | 46        | 36    | 71      |
| Daily rain avg. last 5 days <sup>2</sup>     | 10    | 6           | 11        | 6        | 6         | 3     | 9       |
| Daily rain avg. last 10 days <sup>2</sup>    | 7     | 5           | 9         | 5        | 5         | 4     | 7       |
| Max daily rain last 5 days <sup>3</sup>      | 30    | 21          | 32        | 15       | 18        | 11    | 27      |
| Max daily rain last 10 days <sup>3</sup>     | 33    | 26          | 36        | 20       | 21        | 15    | 30      |
| Abs max daily rain <sup>4</sup>              | 100   | 65          | 154       | 42       | 13        | 39    | -       |
| Abs max daily rain last 5 days <sup>4</sup>  | 154   | 75          | 154       | 77       | 140       | 39    | -       |
| Abs max daily rain last 10 days <sup>4</sup> | 154   | 75          | 154       | 109      | 140       | 39    | -       |

\* Average by event process except for absolute values (last three lines of the table).

<sup>1</sup> Cumulative rainfall 5 and 10 days prior to the event day.

<sup>2</sup> Daily rainfall average 5 and 10 days prior to the event day.

<sup>3</sup> Maximum daily rainfall 5 and 10 days prior to the event day.

<sup>4</sup> Absolute maximum rainfall recorded (i.e., for one event) on the event day, 5 and 10 days prior to the event day.

*Table S10: Monthly distribution of events by event process.*

| Year           | Flood<br>(420) | Debris flow<br>(69) | Landslide<br>(192) | Rockfall<br>(96) | Avalanche<br>(16) | Other<br>(53) | Average |
|----------------|----------------|---------------------|--------------------|------------------|-------------------|---------------|---------|
| January (27)   | 0%             | 4%                  | 4%                 | 15%              | 6%                | 0%            | 3%      |
| February (65)  | 0%             | 1%                  | 6%                 | 6%               | 19%               | 81%           | 8%      |
| March (26)     | 1%             | 0%                  | 2%                 | 13%              | 50%               | 2%            | 3%      |
| April (28)     | 2%             | 0%                  | 6%                 | 7%               | 0%                | 2%            | 3%      |
| May (107)      | 13%            | 10%                 | 16%                | 15%              | 0%                | 2%            | 13%     |
| June (253)     | 41%            | 16%                 | 29%                | 7%               | 0%                | 8%            | 30%     |
| July (210)     | 31%            | 51%                 | 19%                | 8%               | 0%                | 2%            | 25%     |
| August (35)    | 4%             | 12%                 | 4%                 | 1%               | 0%                | 2%            | 4%      |
| September (14) | 1%             | 6%                  | 2%                 | 2%               | 0%                | 0%            | 2%      |
| October (14)   | 1%             | 0%                  | 1%                 | 10%              | 0%                | 0%            | 2%      |
| November (58)  | 6%             | 0%                  | 9%                 | 11%              | 6%                | 2%            | 7%      |
| December (9)   | 0%             | 0%                  | 1%                 | 4%               | 19%               | 0%            | 1%      |
| Total (846)    | 100%           | 100%                | 100%               | 100%             | 100%              | 100%          | 100%    |

*Table S11: Transport mode distribution by event process.*

| Transport mode | Flood<br>(420) | Debris flow<br>(69) | Landslide<br>(192) | Rockfall<br>(96) | Avalanche<br>(16) | Other<br>(53) | Total |
|----------------|----------------|---------------------|--------------------|------------------|-------------------|---------------|-------|
| Road (747)     | 53%            | 9%                  | 20%                | 10%              | 1%                | 7%            | 100%  |
| Railway (99)   | 27%            | 2%                  | 42%                | 20%              | 4%                | 5%            | 100%  |

*Table S12: Road class distribution by event process.*

| Road class                | Flood<br>(393) | Debris flow<br>(67) | Landslide<br>(151) | Rockfall<br>(76) | Avalanche<br>(12) | Other<br>(48) | Average |
|---------------------------|----------------|---------------------|--------------------|------------------|-------------------|---------------|---------|
| Highway (34)              | 7%             | 0%                  | 2%                 | 1%               | 10%               | 2%            | 5%      |
| Motorway (2)              | 0%             | 0%                  | 1%                 | 0%               | 0%                | 0%            | 0%      |
| Major transit road (99)   | 11%            | 8%                  | 11%                | 36%              | 36%               | 6%            | 13%     |
| Regional road (94)        | 11%            | 7%                  | 18%                | 18%              | 9%                | 8%            | 12%     |
| Urban road (426)          | 65%            | 37%                 | 48%                | 38%              | 36%               | 82%           | 57%     |
| Minor road (72)           | 4%             | 42%                 | 15%                | 4%               | 9%                | 2%            | 10%     |
| Forest or land trail (20) | 2%             | 6%                  | 5%                 | 5%               | 0%                | 0%            | 3%      |
| Total (747)               | 100%           | 100%                | 100%               | 100%             | 100%              | 100%          | 100%    |

*Table S13: Railway class distribution by event process.*

| Track class   | Flood<br>(27) | Debris flow<br>(2) | Landslide<br>(41) | Rockfall<br>(20) | Avalanche<br>(4) | Other<br>(5) | Average |
|---------------|---------------|--------------------|-------------------|------------------|------------------|--------------|---------|
| National (29) | 37%           | 0%                 | 32%               | 30%              | 0%               | 0%           | 29%     |
| Regional (66) | 56%           | 100%               | 68%               | 70%              | 100%             | 60%          | 67%     |
| Tram (4)      | 7%            | 0%                 | 0%                | 0%               | 0%               | 40%          | 4%      |
| Total (99)    | 100%          | 100%               | 100%              | 100%             | 100%             | 100%         | 100%    |

*Table S14: Distribution of possibility of deviations by event process.*

| Possibility of deviation | Flood<br>(420) | Debris flow<br>(69) | Landslide<br>(192) | Rockfall<br>(96) | Avalanche<br>(16) | Other<br>(53) | Total |
|--------------------------|----------------|---------------------|--------------------|------------------|-------------------|---------------|-------|
| Large (342)              | 63%            | 17%                 | 15%                | 8%               | 0%                | 52%           | 40%   |
| Middle (190)             | 21%            | 7%                  | 32%                | 17%              | 7%                | 33%           | 23%   |
| Small (102)              | 7%             | 6%                  | 13%                | 32%              | 66%               | 4%            | 12%   |
| No (212)                 | 9%             | 70%                 | 40%                | 43%              | 27%               | 11%           | 25%   |
| Total (846)              | 100%           | 100%                | 100%               | 100%             | 100%              | 100%          | 100%  |

*Table S15: Distribution of track damage by event process.*

| Damage level           | Flood<br>(420) | Debris flow<br>(69) | Landslide<br>(192) | Rockfall<br>(96) | Avalanche<br>(16) | Other<br>(53) | Total |
|------------------------|----------------|---------------------|--------------------|------------------|-------------------|---------------|-------|
| No closure (149)       | 34%            | 0%                  | 1%                 | 3%               | 6%                | 4%            | 18%   |
| Closure (483)          | 60%            | 35%                 | 50%                | 50%              | 81%               | 96%           | 57%   |
| Partial damage (143)   | 1%             | 39%                 | 37%                | 39%              | 13%               | 0%            | 17%   |
| Total destruction (53) | 1%             | 26%                 | 12%                | 8%               | 0%                | 0%            | 6%    |
| Unknown damage (18)    | 4%             | 0%                  | 0%                 | 0%               | 0%                | 0%            | 2%    |
| Total (846)            | 100%           | 100%                | 100%               | 100%             | 100%              | 100%          | 100%  |

*Table S16: Distribution of damage and impact on vehicles by event process.*

| Damage and impact type on vehicles                | Flood<br>(420) | Debris flow<br>(69) | Landslide<br>(192) | Rockfall<br>(96) | Avalanche<br>(16) | Other<br>(53) | Total |
|---------------------------------------------------|----------------|---------------------|--------------------|------------------|-------------------|---------------|-------|
| No damage (803)                                   | 98%            | 93%                 | 96%                | 89%              | 80%               | 89%           | 95%   |
| Vehicle damage: direct impact <sup>1</sup> (25)   | 1%             | 7%                  | 1%                 | 7%               | 7%                | 7%            | 3%    |
| Vehicle damage: indirect impact <sup>2</sup> (18) | 1%             | 0%                  | 3%                 | 4%               | 13%               | 4%            | 2%    |
| Total (846)                                       | 100%           | 100%                | 100%               | 100%             | 100%              | 100%          | 100%  |

<sup>1</sup> Direct impact: a vehicle is directly affected by a hazard.

<sup>2</sup> Indirect impact: a vehicle collides with an event mass already fallen on the track.

*Table S17: Distribution of injury and death by event process.*

| Injury and death          | Flood<br>(420) | Debris flow<br>(69) | Landslide<br>(192) | Rockfall<br>(96) | Avalanche<br>(16) | Other<br>(53) | Total |
|---------------------------|----------------|---------------------|--------------------|------------------|-------------------|---------------|-------|
| No damage on people (828) | 99%            | 96%                 | 98%                | 93%              | 100%              | 98%           | 98%   |
| Injury (15)               | 1%             | 4%                  | 1%                 | 5%               | 0%                | 2%            | 2%    |
| Death (3)                 | 0%             | 0%                  | 1%                 | 2%               | 0%                | 0%            | 0%    |
| Total (846)               | 100%           | 100%                | 100%               | 100%             | 100%              | 100%          | 100%  |

*Table S18: Distribution of deviation length on roads by event process.*

| Deviation length | Flood<br>(383) | Debris flow<br>(21) | Landslide<br>(116) | Rockfall<br>(58) | Avalanche<br>(11) | Other<br>(49) | Mean |
|------------------|----------------|---------------------|--------------------|------------------|-------------------|---------------|------|
| 0-1 km (255)     | 58%            | 29%                 | 12%                | 9%               | 0%                | 12%           | 40%  |
| 2-5 km (102)     | 14%            | 38%                 | 16%                | 3%               | 0%                | 39%           | 16%  |
| 6-9 km (57)      | 9%             | 10%                 | 9%                 | 7%               | 0%                | 14%           | 9%   |
| 10-19 km (100)   | 9%             | 5%                  | 34%                | 21%              | 0%                | 22%           | 16%  |
| 20-49 km (63)    | 5%             | 0%                  | 17%                | 26%              | 45%               | 8%            | 10%  |
| 50-99 km (24)    | 3%             | 5%                  | 5%                 | 12%              | 0%                | 0%            | 4%   |
| 100-249 km (30)  | 2%             | 14%                 | 6%                 | 17%              | 18%               | 4%            | 5%   |
| 250-350 km (7)   | 0%             | 0%                  | 0%                 | 5%               | 36%               | 0%            | 1%   |
| Total (638)      | 100%           | 100%                | 100%               | 100%             | 100%              | 100%          | 100% |

67 *Table S19: Direct damage cost distribution by events type.*

| Damage level [EUR]      | Flood<br>(420) | Debris<br>flow (69) | Landslide<br>(192) | Rockfall<br>(96) | Avalanche<br>(16) | Other<br>(53) | Total     |
|-------------------------|----------------|---------------------|--------------------|------------------|-------------------|---------------|-----------|
| Annual cost [EUR]       |                |                     |                    |                  |                   |               |           |
| No closure (149)        | 12 665         | 340                 | 85                 | 765              | 255               | 170           | 14 280    |
| Closure (483)           | 514 250        | 71 400              | 262 650            | 160 650          | 28 900            | 107 950       | 1 145 800 |
| Partial damage (143)    | 25 500         | 127 500             | 425 000            | 227 800          | 40 800            | 0             | 846 600   |
| Total destruction (53)  | 72 250         | 459 850             | 528 700            | 246 500          | 0                 | 0             | 1 307 300 |
| Unknown damage (18)     | 45 900         | 0                   | 0                  | 0                | 0                 | 0             | 45 900    |
| Annual cost [million €] | 0.67           | 0.66                | 1.22               | 0.64             | 0.07              | 0.11          | 3.36      |
| Avg. cost by event      | 8 000          | 47 800              | 31 700             | 33 100           | 21 900            | 10 200        | 19 900    |

68  
69 *Table S20: Annual distribution of events by event process.*

| Year        | Flood<br>(420) | Debris flow<br>(69) | Landslide<br>(192) | Rockfall<br>(96) | Avalanche<br>(16) | Other<br>(53) | Average |
|-------------|----------------|---------------------|--------------------|------------------|-------------------|---------------|---------|
| 2012 (60)   | 5%             | 3%                  | 7%                 | 17%              | 25%               | 2%            | 7%      |
| 2013 (99)   | 11%            | 10%                 | 16%                | 14%              | 6%                | 2%            | 12%     |
| 2014 (173)  | 20%            | 10%                 | 30%                | 20%              | 25%               | 0%            | 20%     |
| 2015 (245)  | 25%            | 49%                 | 22%                | 17%              | 25%               | 77%           | 29%     |
| 2016 (269)  | 38%            | 28%                 | 24%                | 33%              | 19%               | 19%           | 32%     |
| Total (846) | 100%           | 100%                | 100%               | 100%             | 100%              | 100%          | 100%    |

70

71

72 *Table S21: Summary of event process key features.*

| Attribute (with values of the greatest occurrence) | Flood     | Debris flow  | Landslide    | Rockfall        | Avalanche  | Other              | Mean          |
|----------------------------------------------------|-----------|--------------|--------------|-----------------|------------|--------------------|---------------|
| Event importance                                   | Small     | Small        | Small        | Small           | Small      | Small              | Small         |
| Yearly number of events                            | 84        | 14           | 38           | 19              | 3          | 11                 | 169           |
| Months                                             | 6, 7      | 7, 6         | 6, 7, 5      | 1, 5, 3, 11, 10 | 3          | 2                  | 6, 7          |
| Season                                             | Spring    | Summer       | Spring       | Spring, Winter  | Winter     | Winter             | Spring        |
| Time of day                                        | Afternoon | Afternoon    | All day      | All day         | Morning    | All day            | Afternoon     |
| Hour                                               | 12-19     | 15-19        | 0-24         | 0-24            | 8-13       | 0-24               | 14-19         |
| Region                                             | Plateau   | Alps         | Alps         | Alps            | Alps       | Plateau            | Alps, Plateau |
| Canton                                             | Bern      | Graubünden   | Valais       | Valais          | Valais     | Vaud               | Bern          |
| Slope angle                                        | 0-10      | 10-20        | 20-30        | 20-30           | 10-20      | 0-10               | 0-10          |
| Slope orientation                                  | S         | W            | S            | W               | N-W        | S-E                | S, S-W and W  |
| Location                                           | Village   | Forest       | Forest       | Forest          | Mountain   | Country            | Village       |
| Damage on track                                    | Closure   | Partial dam. | Closure      | Closure         | Closure    | Closure            | Closure       |
| Direct costs per event (Euro)                      | 6 900     | 39 000       | 25 700       | 261 000         | 155 000    | 8 600              | 16 000        |
| Track geometry                                     | Str. line | Wide curve   | Wide curve   | Wide curve      | Wide curve | S. line & w. curve | Wide curve    |
| Crossing                                           | Near      | No           | No           | No              | No         | No                 | No            |
| Closure duration                                   | 3 hours   | 1 week       | 1 day        | 3 hours         | 1-2 days   | 3 hours            | 3 hours       |
| Possibility of deviation                           | Large     | No           | No           | No              | Small      | Middle             | Large         |
| Deviation length                                   | 0-1 km    | No deviation | No deviation | No deviation    | 250-350 km | 2-5 km             | 0-1 km        |
| Event origin distance                              | -         | Far          | Near         | Far             | Far        | Near               | Near          |
| Event above below                                  | -         | Up           | Up           | Up              | Up         | Up                 | Up            |
| Altitude [m a.s.l.]                                | 525       | 1139         | 809          | 897             | 1274       | 614                | 701           |
| Track type                                         | Road      | Road         | Road         | Road            | Road       | Road               | Road          |
| Track importance                                   | Minor     | Minor        | Minor        | Minor           | Minor      | Minor              | Minor         |
| Rainfall event day [mm]                            | 22        | 14           | 171          | 5               | 4          | 4                  | 17            |

74 *Figure S1: Attributes of the database.*

| Category    |   | DATE |   |   |   |   |   |   |    |    |    |    |    |    |    |
|-------------|---|------|---|---|---|---|---|---|----|----|----|----|----|----|----|
| Attribute   |   | DATE |   |   |   |   |   |   |    |    |    |    |    |    |    |
| Description |   | DATE |   |   |   |   |   |   |    |    |    |    |    |    |    |
| Unit        |   | DATE |   |   |   |   |   |   |    |    |    |    |    |    |    |
| Exemple     |   | DATE |   |   |   |   |   |   |    |    |    |    |    |    |    |
| Comment     |   | DATE |   |   |   |   |   |   |    |    |    |    |    |    |    |
| Source      |   | DATE |   |   |   |   |   |   |    |    |    |    |    |    |    |
| 1           | 2 | 3    | 4 | 5 | 6 | 7 | 8 | 9 | 10 | 11 | 12 | 13 | 14 | 15 | 16 |

| Category    |    | Location |    |    |    |    |    |    |    |  |  |
|-------------|----|----------|----|----|----|----|----|----|----|--|--|
| Attribute   |    | Location |    |    |    |    |    |    |    |  |  |
| Description |    | Location |    |    |    |    |    |    |    |  |  |
| Unit        |    | Location |    |    |    |    |    |    |    |  |  |
| Exemple     |    | Location |    |    |    |    |    |    |    |  |  |
| Comment     |    | Location |    |    |    |    |    |    |    |  |  |
| Source      |    | Location |    |    |    |    |    |    |    |  |  |
| 17          | 18 | 19       | 20 | 21 | 22 | 23 | 24 | 25 | 26 |  |  |



| LOCATION                                                                         |                                 |                                           |                                           |                                           |                                            |                                            |                                            |                                      |                                     |                                     |
|----------------------------------------------------------------------------------|---------------------------------|-------------------------------------------|-------------------------------------------|-------------------------------------------|--------------------------------------------|--------------------------------------------|--------------------------------------------|--------------------------------------|-------------------------------------|-------------------------------------|
| L_Areas                                                                          | L_Area_reg                      | L_MN03_X                                  | L_MN03_Y                                  | L_MN03_Z                                  | L_MN95_X                                   | L_MN95_Y                                   | L_MN95_Z                                   | L_WGS84_Lo                           | L_WGS84_La                          | L_WGS84_Z                           |
| Areas of the event location                                                      | Regional area of the location   | X coordinates in CH1903 coordinate system | Y coordinates in CH1903 coordinate system | Z coordinates in CH1903 coordinate system | X coordinates in CH1903+ coordinate system | Y coordinates in CH1903+ coordinate system | Z coordinates in CH1903+ coordinate system | Longitude in WGS84 coordinate system | Latitude in WGS84 coordinate system | Altitude in WGS84 coordinate system |
|                                                                                  |                                 | [m]                                       | [m]                                       | [m]                                       | [m]                                        | [m]                                        | [m]                                        | [°]                                  | [°]                                 | [m]                                 |
| Alpine region                                                                    | Alps                            | 588456                                    | 98247                                     | 1377                                      | 2588455                                    | 1098247                                    | 1377                                       | 7.289538659                          | 46.03566307                         | 1431                                |
| 5 types: Alpine region, Swiss Plateau, Tabular Jura, Folded Jura and Independent | 3 types: Jura, Plateau and Alps | -                                         | -                                         | -                                         | -                                          | -                                          | -                                          | -                                    | -                                   | -                                   |
| GIS                                                                              | Map                             | GIS                                       | GIS                                       | GIS                                       | GIS                                        | GIS                                        | GIS                                        | GIS                                  | GIS                                 | GIS                                 |
| 27                                                                               | 28                              | 29                                        | 30                                        | 31                                        | 32                                         | 33                                         | 34                                         | 35                                   | 36                                  | 37                                  |

| Event characterization   |                                                                    |                                                                                            |                                                     |                                                                                       |                                                                                                |                                                           |                                        |                                      |                                            |                   |                           |                               |
|--------------------------|--------------------------------------------------------------------|--------------------------------------------------------------------------------------------|-----------------------------------------------------|---------------------------------------------------------------------------------------|------------------------------------------------------------------------------------------------|-----------------------------------------------------------|----------------------------------------|--------------------------------------|--------------------------------------------|-------------------|---------------------------|-------------------------------|
| Number of attributes: 12 |                                                                    |                                                                                            |                                                     |                                                                                       |                                                                                                |                                                           |                                        |                                      |                                            |                   |                           |                               |
| Category                 | Event characterization                                             |                                                                                            |                                                     |                                                                                       |                                                                                                |                                                           |                                        |                                      |                                            |                   |                           |                               |
| Attribute                | E_Type                                                             | E_TypePrec                                                                                 | E_UpDownst                                          | E_UpDownst Risk                                                                       | E_Provenan                                                                                     | E_Volume                                                  | E_Masse                                | E_Width                              | E_Importan                                 | E_Other           | E_PictureName             | E_Picture                     |
| Description              | Type of natural hazard event                                       | Precise type of natural hazard event                                                       | Origin up or downstream of the natural hazard event | Origin up, downstream or only risk of the event                                       | Estimation of the distance of the event origin                                                 | Volume of the event                                       | Masse of the event                     | Width of the event mass on the track | Importance of the event                    | Other information | Picture name of the event | Picture                       |
| Unit                     | -                                                                  | -                                                                                          | -                                                   | -                                                                                     | [m] or -                                                                                       | [m <sup>3</sup> ]                                         | [kg]                                   | [m]                                  | -                                          | -                 | -                         | -                             |
| Exemple                  | Landslide                                                          | Landslide                                                                                  | -                                                   | -                                                                                     | -                                                                                              | -                                                         | -                                      | -                                    | Small                                      | -                 | 2015050400.jpg            | -                             |
| Comment                  | 6 types: rockfall, debris flow, landslide, avalanche, flood, other | 8 types: rockfall, debris flow, landslide, avalanche, flood, hail, snowdrift, falling tree | 3 classes: upstream, downstream and unknown         | 4 classes: upstream, downstream, risk (no event, only preventive closure) and unknown | 3 classes: near (few meters to 10 meters, far (> 10 m) or prevention (only preventive closure) | Estimation of the failed volume on the track of the event | Masse of the event (only for rockfall) | -                                    | 3 classes: small, middle, big (huge event) | -                 | -                         | -                             |
| Source                   | Online article                                                     | Online article                                                                             | Online article                                      | Online article                                                                        | Online article                                                                                 | Online article                                            | Online article                         | Online article                       | Online article                             | Online article    | Online article            | Online article or field visit |
|                          | 38                                                                 | 39                                                                                         | 40                                                  | 41                                                                                    | 42                                                                                             | 43                                                        | 44                                     | 45                                   | 46                                         | 47                | 48                        | 49                            |

| Track characterization   |                                      |                                      |                                                                            |                                               |                                 |                             |                                |                                        |                      |                                |                                        |                  |                                        |                                                   |                                                     |                                                                                    |                                                                                                              |
|--------------------------|--------------------------------------|--------------------------------------|----------------------------------------------------------------------------|-----------------------------------------------|---------------------------------|-----------------------------|--------------------------------|----------------------------------------|----------------------|--------------------------------|----------------------------------------|------------------|----------------------------------------|---------------------------------------------------|-----------------------------------------------------|------------------------------------------------------------------------------------|--------------------------------------------------------------------------------------------------------------|
| Number of attributes: 17 |                                      |                                      |                                                                            |                                               |                                 |                             |                                |                                        |                      |                                |                                        |                  |                                        |                                                   |                                                     |                                                                                    |                                                                                                              |
| Category                 | Track characterization               |                                      |                                                                            |                                               |                                 |                             |                                |                                        |                      |                                |                                        |                  |                                        |                                                   |                                                     |                                                                                    |                                                                                                              |
| Attribute                | T_Type                               | T_TrainClasses                       | T_RoadClasses                                                              | T_MajorMin                                    | T_Closure                       | T_DetailClosure             | T_ClosureDuration              | T_ClosureDurationRound                 | T_Deviation          | T_DistDev                      | T_DistDevRound                         | T_DevDetail      | T_PossDev                              | T_PopDirAf                                        | T_PopIndAf                                          | T_Sinuosity                                                                        | T_crossing                                                                                                   |
| Description              | Distinction between road and railway | Classes of the affected train tracks | Classes of the affected road tracks                                        | Simplified classification of track importance | Track closure or not            | Detail of the track closure | Time of track closure in hours | Rounded time of track closure in hours | Deviation or not     | Distance of the deviation path | Rounded distance of the deviation path | Deviation detail | Capacity to have other deviation paths | Population directly affected by the track closure | Population indirectly affected by the track closure | Sinuosity of the affected track                                                    | Crossing near of the event or not                                                                            |
| Unit                     | -                                    | -                                    | -                                                                          | -                                             | -                               | -                           | [h]                            | [h]                                    | -                    | [km]                           | [km]                                   | -                | -                                      | -                                                 | -                                                   | -                                                                                  | -                                                                                                            |
| Exemple                  | Road                                 | White                                | White                                                                      | Minor                                         | Yes                             | -                           | 23                             | 24                                     | -                    | 8                              | 10                                     | -                | Large                                  | Any                                               | Small                                               | NSC                                                                                | NO                                                                                                           |
| Comment                  | 2 types: road or railway             | 3 classes: national, regional, tram  | 8 classes: highway, semi-highway, red, yellow, white, white dash and black | 2 classes: minor and major                    | Three classes: yes, no, unknown | -                           | -                              | -                                      | 2 classes: yes or no | -                              | -                                      | -                | 4 classes: large, middle, small, any   | 5 classes: very large, large, middle, small, any  | 5 classes: very large, large, middle, small, any    | 6 types: Straight Line, Wide Curve, Tight Curve, Near Wide Curve, Near Tight Curve | 4 types: IN a crossing, NEAR a crossing, NO crossing, IN the area and unknown (not enough location accuracy) |
| Source                   | Online article                       | Map                                  | Map                                                                        | Map                                           | Online article                  | Online article              | Online article                 | Online article                         | Map                  | Map                            | Map                                    | Map              | Map                                    | Map                                               | Map                                                 | Map                                                                                | Map                                                                                                          |
|                          | 50                                   | 51                                   | 52                                                                         | 53                                            | 54                              | 55                          | 56                             | 57                                     | 58                   | 59                             | 60                                     | 61               | 62                                     | 63                                                | 64                                                  | 65                                                                                 | 66                                                                                                           |

| Damage                   |                                                                                                                                       |                    |                          |                    |                         |                    |                                                          |                         |                           |                        |                               |
|--------------------------|---------------------------------------------------------------------------------------------------------------------------------------|--------------------|--------------------------|--------------------|-------------------------|--------------------|----------------------------------------------------------|-------------------------|---------------------------|------------------------|-------------------------------|
| Number of attributes: 11 |                                                                                                                                       |                    |                          |                    |                         |                    |                                                          |                         |                           |                        |                               |
| Category                 | Damage                                                                                                                                |                    |                          |                    |                         |                    |                                                          |                         |                           |                        |                               |
| Attribute                | D_Form                                                                                                                                | D_Injured          | D_InjuredNb              | D_Death            | D_DeathNb               | D_Vehicule         | D_ImpactTy                                               | D_VehiType              | D_VehiNb                  | D_TrackDetail          | D_infras_type                 |
| Description              | Form of track damage                                                                                                                  | Injured people?    | Number of injured people | Killed people?     | Number of killed people | Damage to vehicle  | Type of impact between vehicle and event                 | Type of damaged vehicle | Number of damaged vehicle | Detail of track damage | Type of infrastructure damage |
| Unit                     | -                                                                                                                                     | -                  | -                        | -                  | -                       | -                  | -                                                        | -                       | -                         | -                      | -                             |
| Exemple                  | ?                                                                                                                                     | No                 | -                        | No                 | -                       | No                 | -                                                        | -                       | -                         | -                      | -                             |
| Comment                  | 6 classes: ? (unknown), NC (no closure), C (closure due to sedimentation), P (partial damage), T (total destruction), and not studied | 2 types: yes or no | -                        | 2 types: yes or no | -                       | 2 types: yes or no | Three types: no impact, direct impact or indirect impact | -                       | -                         | -                      | -                             |
| Source                   | Online article                                                                                                                        | Online article     | Online article           | Online article     | Online article          | Online article     | Online article                                           | Online article          | Online article            |                        | Online article                |
|                          | 67                                                                                                                                    | 68                 | 69                       | 70                 | 71                      | 72                 | 73                                                       | 74                      | 75                        | 76                     | 77                            |

| Weather                  |                                          |                                        |                                                 |                                                  |                                                         |                                                          |                                                         |                                                          |                    |                                               |                                                |                                                  |                                                   |                                                  |                                                   |                                              |                                                |                                                 |
|--------------------------|------------------------------------------|----------------------------------------|-------------------------------------------------|--------------------------------------------------|---------------------------------------------------------|----------------------------------------------------------|---------------------------------------------------------|----------------------------------------------------------|--------------------|-----------------------------------------------|------------------------------------------------|--------------------------------------------------|---------------------------------------------------|--------------------------------------------------|---------------------------------------------------|----------------------------------------------|------------------------------------------------|-------------------------------------------------|
| Number of attributes: 68 |                                          |                                        |                                                 |                                                  |                                                         |                                                          |                                                         |                                                          |                    |                                               |                                                |                                                  |                                                   |                                                  |                                                   |                                              |                                                |                                                 |
| Category                 |                                          |                                        |                                                 |                                                  |                                                         |                                                          |                                                         |                                                          |                    |                                               |                                                |                                                  |                                                   |                                                  |                                                   |                                              |                                                |                                                 |
| Attribute                | M_Meteo                                  | M_Sun                                  | M_Sun_avg_5d                                    | M_Sun_avg_10d                                    | M_Sun_max_5d                                            | M_Sun_max_10d                                            | M_Sun_min_5d                                            | M_Sun_min_10d                                            | M_Rain             | M_Rain_5d_cum                                 | M_Rain_10d_cum                                 | M_Rain_max_5d                                    | M_Rain_max_10d                                    | M_Rain_avg_5d                                    | M_Rain_avg_10d                                    | M_Storm_near                                 | M_Storm_near_5d                                | M_Storm_near_10d                                |
| Description              | Rain information for a given time period | Percentage of sun during the event day | Percentage of sun of the last 5 days from event | Percentage of sun of the last 10 days from event | Maximum percentage of sun of the last 5 days from event | Maximum percentage of sun of the last 10 days from event | Minimum percentage of sun of the last 5 days from event | Maximum percentage of sun of the last 10 days from event | Rain the event day | Cumulative rain of the last 5 days from event | Cumulative rain of the last 10 days from event | Maximum daily rain of the last 5 days from event | Maximum daily rain of the last 10 days from event | Average daily rain of the last 5 days from event | Average daily rain of the last 10 days from event | Number of near storms the event day          | Number of near storms of the 5 days from event | Number of near storms of the 10 days from event |
| Unit                     | -                                        | %                                      | %                                               | %                                                | %                                                       | %                                                        | %                                                       | %                                                        | mm                 | mm                                            | mm                                             | mm                                               | mm                                                | mm                                               | mm                                                | -                                            | -                                              | -                                               |
| Exemple                  | -                                        | 4                                      | 29.4                                            | 34.1                                             | 77                                                      | 98                                                       | 0                                                       | 0                                                        | 0.2                | 28.7                                          | 38.4                                           | 19.9                                             | 19.9                                              | 5.74                                             | 3.84                                              | 0                                            | 0                                              | 0                                               |
| Comment                  | Only for some events                     | -                                      | -                                               | -                                                | -                                                       | -                                                        | -                                                       | -                                                        | -                  | -                                             | -                                              | -                                                | -                                                 | -                                                | -                                                 | Near storm: <3 km around the weather station | Near storm: <3 km around the weather station   | Near storm: <3 km around the weather station    |
| Source                   | Sturmarchiv                              | MeteoSwiss                             | MeteoSwiss                                      | MeteoSwiss                                       | MeteoSwiss                                              | MeteoSwiss                                               | MeteoSwiss                                              | MeteoSwiss                                               | MeteoSwiss         | MeteoSwiss                                    | MeteoSwiss                                     | MeteoSwiss                                       | MeteoSwiss                                        | MeteoSwiss                                       | MeteoSwiss                                        | MeteoSwiss                                   | MeteoSwiss                                     | MeteoSwiss                                      |
|                          | 78                                       | 79                                     | 80                                              | 81                                               | 82                                                      | 83                                                       | 84                                                      | 85                                                       | 86                 | 87                                            | 88                                             | 89                                               | 90                                                | 91                                               | 92                                                | 93                                           | 94                                             | 95                                              |

| Weather     |                                                              |                                                               |                                             |                                               |                                                |                                                             |                                                              |                                    |                                               |                                                |                                                             |                                                              |                                   |                                                |                                                 |                                   |                                                |
|-------------|--------------------------------------------------------------|---------------------------------------------------------------|---------------------------------------------|-----------------------------------------------|------------------------------------------------|-------------------------------------------------------------|--------------------------------------------------------------|------------------------------------|-----------------------------------------------|------------------------------------------------|-------------------------------------------------------------|--------------------------------------------------------------|-----------------------------------|------------------------------------------------|-------------------------------------------------|-----------------------------------|------------------------------------------------|
| Attribute   | M_Storm_near_max_daily_5d                                    | M_Storm_near_max_daily_10d                                    | M_Storm_far                                 | M_Storm_far_sum_5d                            | M_Storm_far_sum_10d                            | M_Storm_far_max_daily_5d                                    | M_Storm_far_max_daily_10d                                    | M_Storm_all                        | M_Storm_all_sum_5d                            | M_Storm_all_sum_10d                            | M_Storm_all_max_daily_5d                                    | M_Storm_all_max_daily_10d                                    | M_Temp_min                        | M_Temp_min_5d                                  | M_Temp_min_10d                                  | M_Temp_max                        | M_Temp_max_5d                                  |
| Description | Maximum daily number of near storms of the 5 days from event | Maximum daily number of near storms of the 10 days from event | Number of far storms the event day          | Number of far storms of the 5 days from event | Number of far storms of the 10 days from event | Maximum daily number of far storms of the 5 days from event | Maximum daily number of far storms of the 10 days from event | Number of all storms the event day | Number of all storms of the 5 days from event | Number of all storms of the 10 days from event | Maximum daily number of all storms of the 5 days from event | Maximum daily number of all storms of the 10 days from event | Minimum temperature the event day | Minimum temperature the last 5 days from event | Minimum temperature the last 10 days from event | Maximum temperature the event day | Maximum temperature the last 5 days from event |
| Unit        | -                                                            | -                                                             | -                                           | -                                             | -                                              | -                                                           | -                                                            | -                                  | -                                             | -                                              | -                                                           | -                                                            | [°C]                              | [°C]                                           | [°C]                                            | [°C]                              | [°C]                                           |
| Exemple     | 0                                                            | 0                                                             | 0                                           | 0                                             | 2                                              | 0                                                           | 1                                                            | 2                                  | 3                                             | 10                                             | 1                                                           | 5                                                            | 7                                 | 1                                              | -3                                              | 14                                | 14                                             |
| Comment     | Near storm: <3 km around the weather station                 | Near storm: <3 km around the weather station                  | Far storm: >3 km around the weather station | Far storm: >3 km around the weather station   | Far storm: >3 km around the weather station    | Far storm: >3 km around the weather station                 | Far storm: >3 km around the weather station                  | -                                  | -                                             | -                                              | -                                                           | -                                                            | -                                 | -                                              | -                                               | -                                 | -                                              |
| Source      | MeteoSwiss                                                   | MeteoSwiss                                                    | MeteoSwiss                                  | MeteoSwiss                                    | MeteoSwiss                                     | MeteoSwiss                                                  | MeteoSwiss                                                   | MeteoSwiss                         | MeteoSwiss                                    | MeteoSwiss                                     | MeteoSwiss                                                  | MeteoSwiss                                                   | MeteoSwiss                        | MeteoSwiss                                     | MeteoSwiss                                      | MeteoSwiss                        | MeteoSwiss                                     |
|             | 96                                                           | 97                                                            | 98                                          | 99                                            | 100                                            | 101                                                         | 102                                                          | 103                                | 104                                           | 105                                            | 106                                                         | 107                                                          | 108                               | 109                                            | 110                                             | 111                               | 112                                            |

77

78



| M_Temp_avg_10d                                  | M_Temp_min_Corr                                                                                                             | M_Temp_min_5d_Corr                                                                                                          | M_Temp_min_10d_Corr                                                                                                         | M_Temp_max_Corr                                                                                                             | M_Temp_max_5d_Corr                                                                                                          | M_Temp_max_10d_Corr                                                                                                         | M_Temp_avg_Corr                                                                                                             | M_Temp_avg_5d_Corr                                                                                                          | M_Temp_avg_10d_Corr                                                                                                         | M_Temp_amp_Corr                     | M_Temp_amp_5d_Corr                                    | M_Temp_amp_10d_Corr                                  | M_Wind_avg                       |
|-------------------------------------------------|-----------------------------------------------------------------------------------------------------------------------------|-----------------------------------------------------------------------------------------------------------------------------|-----------------------------------------------------------------------------------------------------------------------------|-----------------------------------------------------------------------------------------------------------------------------|-----------------------------------------------------------------------------------------------------------------------------|-----------------------------------------------------------------------------------------------------------------------------|-----------------------------------------------------------------------------------------------------------------------------|-----------------------------------------------------------------------------------------------------------------------------|-----------------------------------------------------------------------------------------------------------------------------|-------------------------------------|-------------------------------------------------------|------------------------------------------------------|----------------------------------|
| Average temperature the last 10 days from event | Corrected minimum temperature the event day                                                                                 | Corrected minimum temperature the last 5 days from event                                                                    | Corrected minimum temperature the last 10 days from event                                                                   | Corrected maximum temperature the event day                                                                                 | Corrected maximum temperature the last 5 days from event                                                                    | Corrected maximum temperature the last 10 days from event                                                                   | Corrected average temperature the event day                                                                                 | Corrected average temperature the last 5 days from event                                                                    | Corrected average temperature the last 10 days from event                                                                   | Temperature amplitude the event day | Temperature amplitude the last 10 days from the event | Temperature amplitude the last 5 days from the event | Average wind speed the event day |
| [°C]                                            | [°C]                                                                                                                        | [°C]                                                                                                                        | [°C]                                                                                                                        | [°C]                                                                                                                        | [°C]                                                                                                                        | [°C]                                                                                                                        | [°C]                                                                                                                        | [°C]                                                                                                                        | [°C]                                                                                                                        | [°C]                                | [°C]                                                  | [°C]                                                 | [km/h]                           |
| 7                                               | 9                                                                                                                           | 3                                                                                                                           | -1                                                                                                                          | 16                                                                                                                          | 16                                                                                                                          | 17                                                                                                                          | 12                                                                                                                          | 9                                                                                                                           | 9                                                                                                                           | 9                                   | 12                                                    | 15                                                   | 8                                |
| -                                               | Correction with height difference between weather station and event location with lapse rate of -0.65 °C for +100m altitude | Correction with height difference between weather station and event location with lapse rate of -0.65 °C for +100m altitude | Correction with height difference between weather station and event location with lapse rate of -0.65 °C for +100m altitude | Correction with height difference between weather station and event location with lapse rate of -0.65 °C for +100m altitude | Correction with height difference between weather station and event location with lapse rate of -0.65 °C for +100m altitude | Correction with height difference between weather station and event location with lapse rate of -0.65 °C for +100m altitude | Correction with height difference between weather station and event location with lapse rate of -0.65 °C for +100m altitude | Correction with height difference between weather station and event location with lapse rate of -0.65 °C for +100m altitude | Correction with height difference between weather station and event location with lapse rate of -0.65 °C for +100m altitude | -                                   | -                                                     | -                                                    | -                                |
| MeteoSwiss                                      | MeteoSwiss                                                                                                                  | MeteoSwiss                                                                                                                  | MeteoSwiss                                                                                                                  | MeteoSwiss                                                                                                                  | MeteoSwiss                                                                                                                  | MeteoSwiss                                                                                                                  | MeteoSwiss                                                                                                                  | MeteoSwiss                                                                                                                  | MeteoSwiss                                                                                                                  | MeteoSwiss                          | MeteoSwiss                                            | MeteoSwiss                                           | MeteoSwiss                       |
| 116                                             | 117                                                                                                                         | 118                                                                                                                         | 119                                                                                                                         | 120                                                                                                                         | 121                                                                                                                         | 122                                                                                                                         | 123                                                                                                                         | 124                                                                                                                         | 125                                                                                                                         | 126                                 | 127                                                   | 128                                                  | 129                              |

| M_Wind_avg_5d                                 | M_Win_avg_10d                                  | M_Wind_max                       | M_Wind_max_5d                                 | M_Wind_max_10d                                 | M_Wind_dir                                        | M_Win_dir_5d                                      | M_Win_dir_10d                                      | M_Snow                          | M_Fresh_snow                          | M_Fresh_snow_5d                                    | M_Fresh_snow_10d                                    | M_Accronym_Stn_Weath                 | M_Alt_Stn_Weath                      | M_Diff_Alt_Stn_Weath_Event                                            | M_Dist_Stn_Weath                                           |
|-----------------------------------------------|------------------------------------------------|----------------------------------|-----------------------------------------------|------------------------------------------------|---------------------------------------------------|---------------------------------------------------|----------------------------------------------------|---------------------------------|---------------------------------------|----------------------------------------------------|-----------------------------------------------------|--------------------------------------|--------------------------------------|-----------------------------------------------------------------------|------------------------------------------------------------|
| Average wind speed the 5 last days from event | Average wind speed the last 10 days from event | Maximum wind speed the event day | Maximum wind speed the 5 last days from event | Maximum wind speed the last 10 days from event | Average wind direction the event day              | Average wind direction the last 5 days from event | Average wind direction the last 10 days from event | Snow cover height the event day | Fresh snow cover height the event day | Fresh snow cover height the 5 last days from event | Fresh snow cover height the last 10 days from event | Accronym of the used weather station | Altitude of the used weather station | Altitude difference between the weather station and the even location | Distance between the weather station and the even location |
| [km/h]                                        | [km/h]                                         | [km/h]                           | [km/h]                                        | [km/h]                                         | [°]                                               | [°]                                               | [°]                                                | [cm]                            | [cm]                                  | [cm]                                               | [cm]                                                | -                                    | [m] a.s.l.                           | [m]                                                                   | [km]                                                       |
| 9                                             | 10                                             | 32                               | 38                                            | 46                                             | 47                                                | 48                                                | 63.9                                               | 0                               | 0                                     | 0                                                  | 0                                                   | ZER                                  | 1638                                 | -261                                                                  | 36                                                         |
| -                                             | -                                              | -                                | -                                             | -                                              | 0° = North, 90° = East, 180° = South, 270° = West | 0° = North, 90° = East, 180° = South, 270° = West | 0° = North, 90° = East, 180° = South, 270° = West  | -                               | -                                     | -                                                  | -                                                   | -                                    | -                                    | -                                                                     | -                                                          |
| MeteoSwiss                                    | MeteoSwiss                                     | MeteoSwiss                       | MeteoSwiss                                    | MeteoSwiss                                     | MeteoSwiss                                        | MeteoSwiss                                        | MeteoSwiss                                         | MeteoSwiss                      | MeteoSwiss                            | MeteoSwiss                                         | MeteoSwiss                                          | MeteoSwiss                           | MeteoSwiss                           | MeteoSwiss                                                            | MeteoSwiss                                                 |
| 130                                           | 131                                            | 132                              | 133                                           | 134                                            | 135                                               | 136                                               | 137                                                | 138                             | 139                                   | 140                                                | 141                                                 | 142                                  | 143                                  | 144                                                                   | 145                                                        |

79

| Geology     |                        |           |           |                                                                                  |                                               |                    |            |                                      |                                                                                             |                                 |                 | Number of attributes: 11 |  |  |  |
|-------------|------------------------|-----------|-----------|----------------------------------------------------------------------------------|-----------------------------------------------|--------------------|------------|--------------------------------------|---------------------------------------------------------------------------------------------|---------------------------------|-----------------|--------------------------|--|--|--|
| Category    | Geology                |           |           |                                                                                  |                                               |                    |            |                                      |                                                                                             |                                 |                 |                          |  |  |  |
| Attribute   | G_watershed            | G_Geol    | G_Tecto_f | G_Geol_f                                                                         | G_Tec1_f                                      | G_Tec2_f           | G_Tec3_f   | G_Acquifer                           | G_Hydrogeology                                                                              | G_Productivity                  | G_Geology       |                          |  |  |  |
| Description | Watershed on the event |           |           | Geology                                                                          | Tectonic 1                                    | Tectonic 2         | Tectonic 3 | Aquifer                              | Hydrogeology                                                                                | Productivity of the event field | General geology |                          |  |  |  |
| Unit        | -                      | -         | -         | -                                                                                | -                                             | -                  | -          | -                                    | -                                                                                           | -                               | -               |                          |  |  |  |
| Exemple     | RHONE                  | er        | pi        | Gneiss et micaschistes (y compris migmatites et phyllites, princ. metasediments) | Nappes de socle cristallin penniques moyennes | Nappe du Mont-Fort | -          | Aquifer reservoirs in coherent rocks | Sparsely productive aquifer reservoirs in non-karstified, cracked and porous coherent rocks | Variable productivity           | Sericite gneiss |                          |  |  |  |
| Comment     | -                      | -         | -         | -                                                                                | -                                             | -                  | -          | -                                    | -                                                                                           | -                               | -               |                          |  |  |  |
| Source      | Swisstopo              | Swisstopo | Swisstopo | Swisstopo                                                                        | Swisstopo                                     | Swisstopo          | Swisstopo  | Swisstopo                            | Swisstopo                                                                                   | Swisstopo                       | Swisstopo       |                          |  |  |  |
|             | 146                    | 147       | 148       | 149                                                                              | 150                                           | 151                | 152        | 153                                  | 154                                                                                         | 155                             | 156             |                          |  |  |  |

| Source      |                                                                                                                                                                                                                                                   |                                                                                                                                                                                                                                                                                                         |                                                                                                                                                     |                                                                                                                                                                                                                                       |                                                                                                                                                                                                                                       |                                                                                                                                                                                                                                         |                                                                                                                                                                                                                                         |                                                                                                                                                                                                                                         |                                                                                                                                                                                                                                         |                                                                                                                                                                                                                                         |                                                                                                                                                                                                                                         |                                                                                                                                                                                                                                         |                                                                                                                                                                                                                                         |                                                                                                                                                                                                                                         |                                                                                                                                                                                                                                         |                                                                                                                                                                                                                                         | Number of attributes: 16 |  |  |  |
|-------------|---------------------------------------------------------------------------------------------------------------------------------------------------------------------------------------------------------------------------------------------------|---------------------------------------------------------------------------------------------------------------------------------------------------------------------------------------------------------------------------------------------------------------------------------------------------------|-----------------------------------------------------------------------------------------------------------------------------------------------------|---------------------------------------------------------------------------------------------------------------------------------------------------------------------------------------------------------------------------------------|---------------------------------------------------------------------------------------------------------------------------------------------------------------------------------------------------------------------------------------|-----------------------------------------------------------------------------------------------------------------------------------------------------------------------------------------------------------------------------------------|-----------------------------------------------------------------------------------------------------------------------------------------------------------------------------------------------------------------------------------------|-----------------------------------------------------------------------------------------------------------------------------------------------------------------------------------------------------------------------------------------|-----------------------------------------------------------------------------------------------------------------------------------------------------------------------------------------------------------------------------------------|-----------------------------------------------------------------------------------------------------------------------------------------------------------------------------------------------------------------------------------------|-----------------------------------------------------------------------------------------------------------------------------------------------------------------------------------------------------------------------------------------|-----------------------------------------------------------------------------------------------------------------------------------------------------------------------------------------------------------------------------------------|-----------------------------------------------------------------------------------------------------------------------------------------------------------------------------------------------------------------------------------------|-----------------------------------------------------------------------------------------------------------------------------------------------------------------------------------------------------------------------------------------|-----------------------------------------------------------------------------------------------------------------------------------------------------------------------------------------------------------------------------------------|-----------------------------------------------------------------------------------------------------------------------------------------------------------------------------------------------------------------------------------------|--------------------------|--|--|--|
| Category    | Source                                                                                                                                                                                                                                            |                                                                                                                                                                                                                                                                                                         |                                                                                                                                                     |                                                                                                                                                                                                                                       |                                                                                                                                                                                                                                       |                                                                                                                                                                                                                                         |                                                                                                                                                                                                                                         |                                                                                                                                                                                                                                         |                                                                                                                                                                                                                                         |                                                                                                                                                                                                                                         |                                                                                                                                                                                                                                         |                                                                                                                                                                                                                                         |                                                                                                                                                                                                                                         |                                                                                                                                                                                                                                         |                                                                                                                                                                                                                                         |                                                                                                                                                                                                                                         |                          |  |  |  |
| Attribute   | Source1                                                                                                                                                                                                                                           | Source2                                                                                                                                                                                                                                                                                                 | Source3                                                                                                                                             | Source4                                                                                                                                                                                                                               | Source5                                                                                                                                                                                                                               | Source6                                                                                                                                                                                                                                 | Source7                                                                                                                                                                                                                                 | Source8                                                                                                                                                                                                                                 | Source9                                                                                                                                                                                                                                 | Source10                                                                                                                                                                                                                                | Source11                                                                                                                                                                                                                                | Source12                                                                                                                                                                                                                                | Source13                                                                                                                                                                                                                                | Source14                                                                                                                                                                                                                                | Source15                                                                                                                                                                                                                                | Source16                                                                                                                                                                                                                                |                          |  |  |  |
| Description | Source 1 for the event                                                                                                                                                                                                                            | Source 2 for the event                                                                                                                                                                                                                                                                                  | Source 3 for the event                                                                                                                              | Source 4 for the event                                                                                                                                                                                                                | Source 5 for the event                                                                                                                                                                                                                | Source 6 for the event                                                                                                                                                                                                                  | Source 7 for the event                                                                                                                                                                                                                  | Source 8 for the event                                                                                                                                                                                                                  | Source 9 for the event                                                                                                                                                                                                                  | Source 10 for the event                                                                                                                                                                                                                 | Source 11 for the event                                                                                                                                                                                                                 | Source 12 for the event                                                                                                                                                                                                                 | Source 13 for the event                                                                                                                                                                                                                 | Source 14 for the event                                                                                                                                                                                                                 | Source 15 for the event                                                                                                                                                                                                                 | Source 16 for the event                                                                                                                                                                                                                 |                          |  |  |  |
| Unit        | -                                                                                                                                                                                                                                                 | -                                                                                                                                                                                                                                                                                                       | -                                                                                                                                                   | -                                                                                                                                                                                                                                     | -                                                                                                                                                                                                                                     | -                                                                                                                                                                                                                                       | -                                                                                                                                                                                                                                       | -                                                                                                                                                                                                                                       | -                                                                                                                                                                                                                                       | -                                                                                                                                                                                                                                       | -                                                                                                                                                                                                                                       | -                                                                                                                                                                                                                                       | -                                                                                                                                                                                                                                       | -                                                                                                                                                                                                                                       | -                                                                                                                                                                                                                                       | -                                                                                                                                                                                                                                       |                          |  |  |  |
| Exemple     | <a href="https://www.rts.ch/info/suisse/6749453-le-chablais-et-le-bas-valais-restent-en-etat-d-alerte-face-aux-pluies.html">https://www.rts.ch/info/suisse/6749453-le-chablais-et-le-bas-valais-restent-en-etat-d-alerte-face-aux-pluies.html</a> | <a href="http://www.24heures.ch/val-de-aud-regions/riviera-chablais/le-monthey-les-securus-sont-pret-a-evacuer-les-riviera-de-la-vieze/story/22490259">http://www.24heures.ch/val-de-aud-regions/riviera-chablais/le-monthey-les-securus-sont-pret-a-evacuer-les-riviera-de-la-vieze/story/22490259</a> | <a href="http://www.24heures.ch/suisse/grande-cruce-ave-1935/story/10943703">http://www.24heures.ch/suisse/grande-cruce-ave-1935/story/10943703</a> | <a href="http://www.24heures.ch/val-de-aud-regions/monthey-reveille-soules-avevacuation-300-personnes/story/19307318">http://www.24heures.ch/val-de-aud-regions/monthey-reveille-soules-avevacuation-300-personnes/story/19307318</a> | <a href="http://www.24heures.ch/val-de-aud-regions/monthey-reveille-soules-avevacuation-300-personnes/story/19307318">http://www.24heures.ch/val-de-aud-regions/monthey-reveille-soules-avevacuation-300-personnes/story/19307318</a> | <a href="https://www.24heures.ch/val-de-aud-regions/monthey-reveille-soules-avevacuation-300-personnes/story/19307318">https://www.24heures.ch/val-de-aud-regions/monthey-reveille-soules-avevacuation-300-personnes/story/19307318</a> |                          |  |  |  |
| Comment     | -                                                                                                                                                                                                                                                 | -                                                                                                                                                                                                                                                                                                       | -                                                                                                                                                   | -                                                                                                                                                                                                                                     | -                                                                                                                                                                                                                                     | -                                                                                                                                                                                                                                       | -                                                                                                                                                                                                                                       | -                                                                                                                                                                                                                                       | -                                                                                                                                                                                                                                       | -                                                                                                                                                                                                                                       | -                                                                                                                                                                                                                                       | -                                                                                                                                                                                                                                       | -                                                                                                                                                                                                                                       | -                                                                                                                                                                                                                                       | -                                                                                                                                                                                                                                       | -                                                                                                                                                                                                                                       |                          |  |  |  |
| Source      | Google Alerts                                                                                                                                                                                                                                     | Google Alerts                                                                                                                                                                                                                                                                                           | Google Alerts                                                                                                                                       | Google Alerts                                                                                                                                                                                                                         | Google Alerts                                                                                                                                                                                                                         | Google Alerts                                                                                                                                                                                                                           | Google Alerts                                                                                                                                                                                                                           | Google Alerts                                                                                                                                                                                                                           | Google Alerts                                                                                                                                                                                                                           | Google Alerts                                                                                                                                                                                                                           | Google Alerts                                                                                                                                                                                                                           | Google Alerts                                                                                                                                                                                                                           | Google Alerts                                                                                                                                                                                                                           | Google Alerts                                                                                                                                                                                                                           | Google Alerts                                                                                                                                                                                                                           | Google Alerts                                                                                                                                                                                                                           |                          |  |  |  |
|             | 157                                                                                                                                                                                                                                               | 158                                                                                                                                                                                                                                                                                                     | 159                                                                                                                                                 | 160                                                                                                                                                                                                                                   | 161                                                                                                                                                                                                                                   | 162                                                                                                                                                                                                                                     | 163                                                                                                                                                                                                                                     | 164                                                                                                                                                                                                                                     | 165                                                                                                                                                                                                                                     | 166                                                                                                                                                                                                                                     | 167                                                                                                                                                                                                                                     | 168                                                                                                                                                                                                                                     | 169                                                                                                                                                                                                                                     | 170                                                                                                                                                                                                                                     | 171                                                                                                                                                                                                                                     | 172                                                                                                                                                                                                                                     |                          |  |  |  |

80

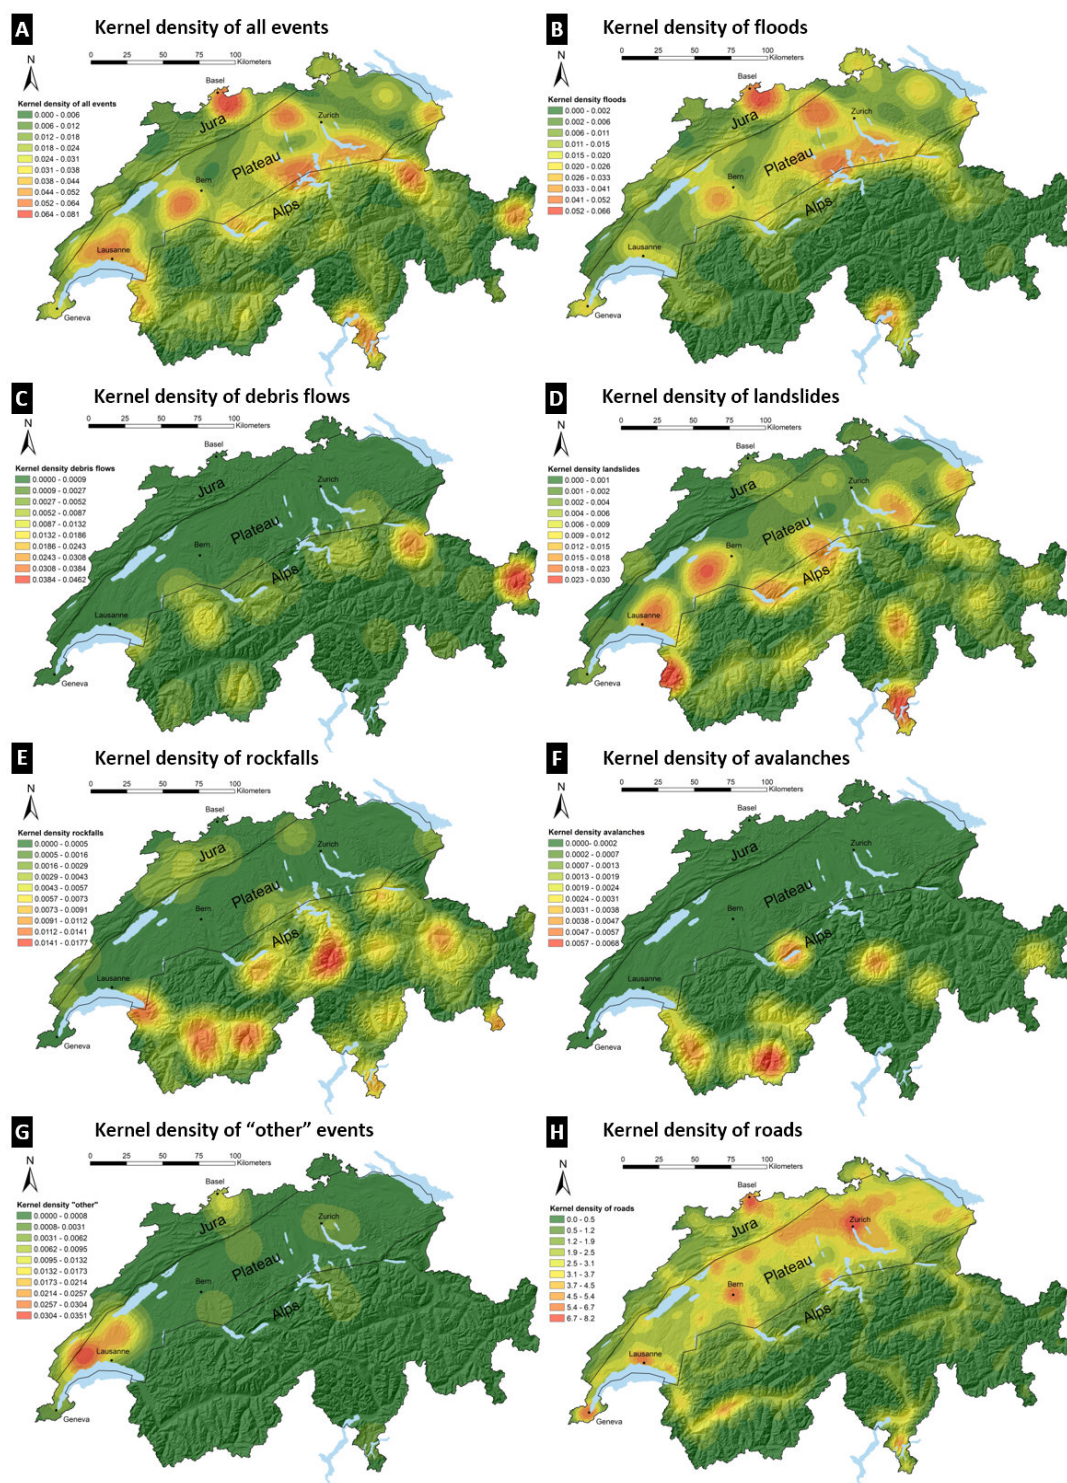

Figure S2: Kernel density maps. Search radius for events: 20 km. Search radius for road network: 10 km. The results were classified using 10 classes with the Jenks natural breaks method. A: All events; B: Floods; C: Debris flows; D: Landslides; E: Rockfalls; F: Avalanches; G: "Other"; H: Roads. Hillshade and map ground sources: Swisstopo.



86  
87

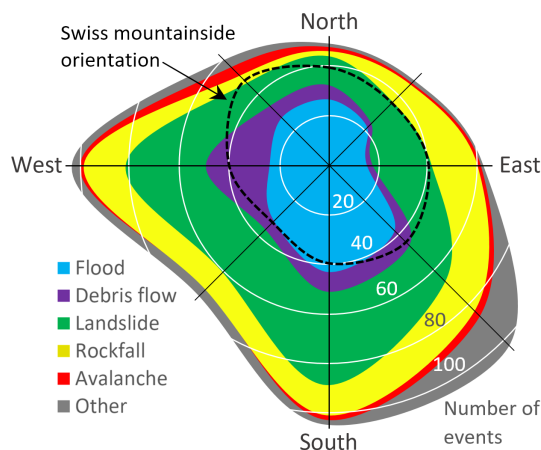

88  
89  
90  
91

Figure S3: Slope orientation distribution of natural hazard events on the Swiss transportation network from 2012 to 2016. The relative distribution of Swiss mountainside orientation is shown by the black dashed line.

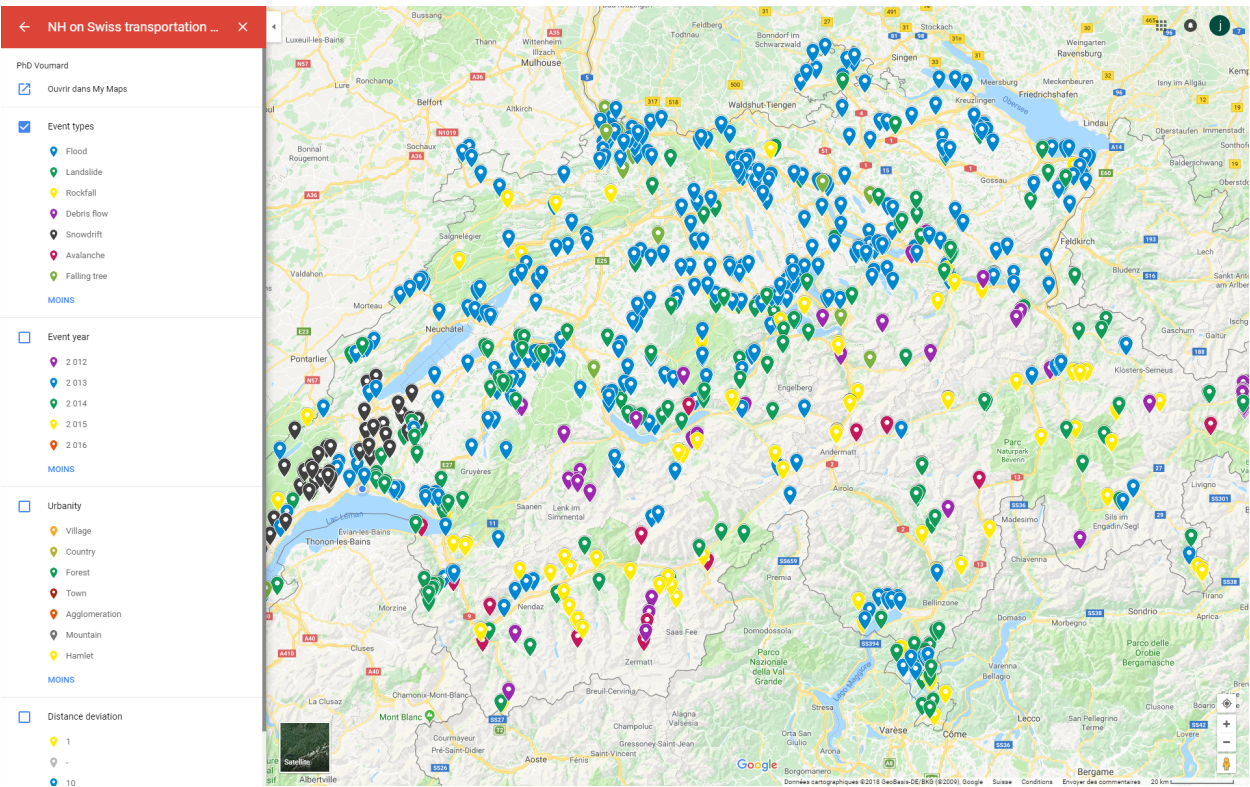

92  
93  
94  
95  
96

Figure S4: Database on Google Maps. Available at (last accessed: 25 January 2018): <https://www.google.ch/maps/@46.7199391,7.1246016,8z/data=!4m2!6m1!1s1qtu6LEYum-7ghpPg9WWzWwgPHYA?hl=fr>, last access: 25 January 2018.

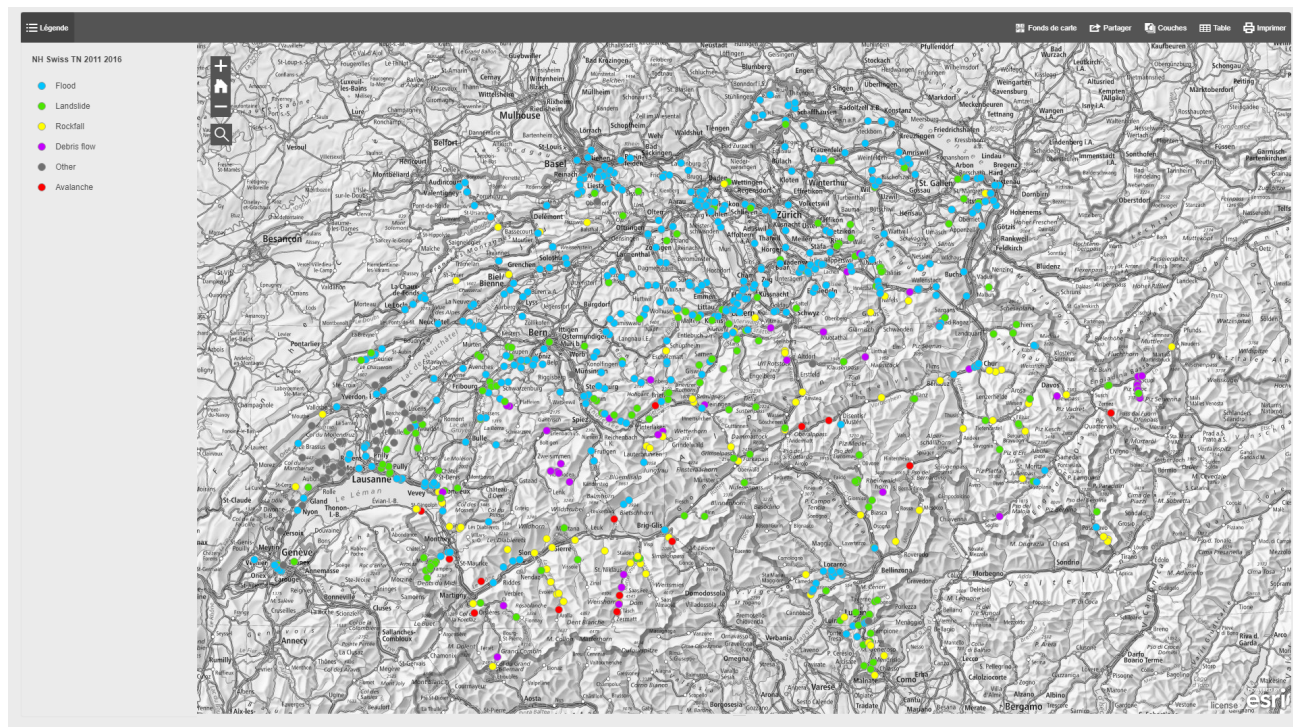

Figure S5: Database on ArcGIS online. Available at (last accessed: 25 January 2018): <http://unil.maps.arcgis.com/apps/MapTools/index.html?webmap=34ee3eb719a647889abd34175969d781>, last access: 25 January 2018.
